# Supplementary material
Source: MDPI journal article supplement (https://www.mdpi.com/2073-4433/12/11/1500)
Supplement: s1 [file s1]

# Supplementary Material: Implications of COVID-19 Restriction Measures in Urban Air Quality of Thessaloniki, Greece: A Machine Learning approach

Dimitris Akritidis <sup>1,\*</sup>, Prodromos Zanis <sup>1</sup>, Aristeidis K. Georgoulas <sup>1</sup>, Eleni Papakosta <sup>2</sup>, Paraskevi Tzoumaka <sup>3</sup> and Apostolos Kelessis <sup>3</sup>

**Table S1.** Descriptive statistics (mean, 10th percentile, 25th percentile, median, 75th percentile, 90th percentile, and standard deviation) for NO<sub>2</sub> (µg/m<sup>3</sup>) and O<sub>3</sub> (µg/m<sup>3</sup>) at AGSOFIA station, and NO<sub>2</sub> (µg/m<sup>3</sup>) at EGNATIA station, for the time period from 1 January, 2018 to 31 December, 2019.

|               | AGSOFIA NO <sub>2</sub> | AGSOFIA O <sub>3</sub> | EGNATIA NO <sub>2</sub> |
|---------------|-------------------------|------------------------|-------------------------|
| <b>mean</b>   | 24                      | 44                     | 72                      |
| <b>10th</b>   | 10                      | 6                      | 45                      |
| <b>25th</b>   | 15                      | 15                     | 57                      |
| <b>median</b> | 22                      | 44                     | 71                      |
| <b>75th</b>   | 31                      | 67                     | 85                      |
| <b>90th</b>   | 40                      | 84                     | 99                      |
| <b>std</b>    | 12                      | 29                     | 22                      |

**Table S2.** XGBoost hyperparameters used for the BAU models.

|                         | AGSOFIA NO <sub>2</sub> | AGSOFIA O <sub>3</sub> | EGNATIA NO <sub>2</sub> |
|-------------------------|-------------------------|------------------------|-------------------------|
| <b>eta</b>              | 0.11                    | 0.11                   | 0.13                    |
| <b>gamma</b>            | 1.51                    | 1.23                   | 1.63                    |
| <b>max_depth</b>        | 7                       | 7                      | 7                       |
| <b>min_child_weight</b> | 1.5                     | 3.0                    | 2.5                     |
| <b>n_estimators</b>     | 255                     | 275                    | 215                     |
| <b>reg_alpha</b>        | 0.8                     | 0.4                    | 0.7                     |
| <b>reg_lambda</b>       | 1.0                     | 0.2                    | 0.6                     |
| <b>subsample</b>        | 0.7                     | 0.6                    | 0.7                     |

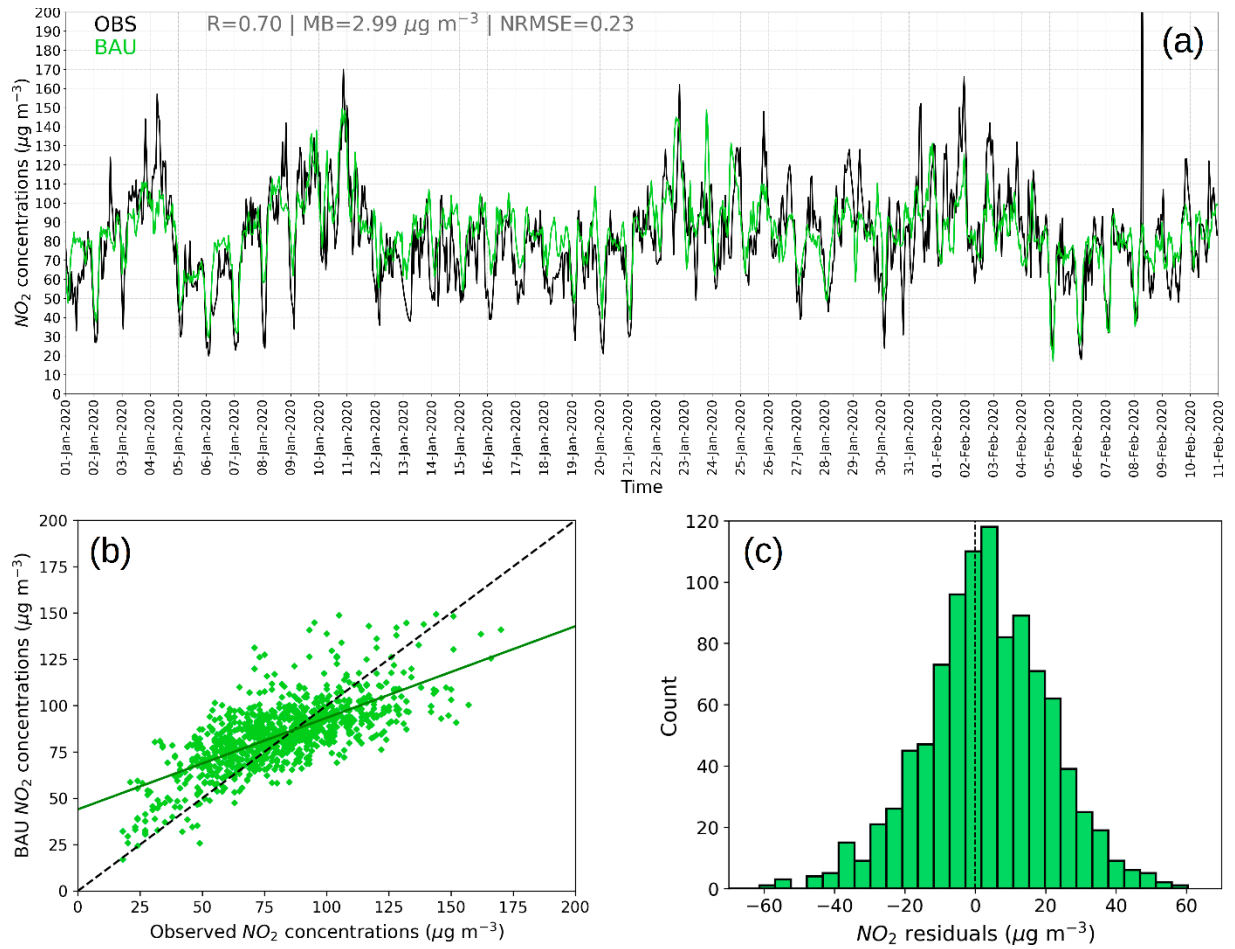

**Figure S1.** a) Observed (black) and BAU (green) timeseries of  $\text{NO}_2$  hourly concentrations at EGNATIA station during the time period from 1 January to 10 February, 2020. b) Scatter plot of observed and BAU  $\text{NO}_2$  hourly concentrations at EGNATIA station during the time period from 1 January to 10 February, 2020. The solid green line represents the regression line of the observed and BAU  $\text{NO}_2$  concentrations, while the dashed black line is the 1:1 line. c) Histogram of  $\text{NO}_2$  residual concentrations (BAU-observation) at EGNATIA station during the time period from 1 January to 10 February, 2020.

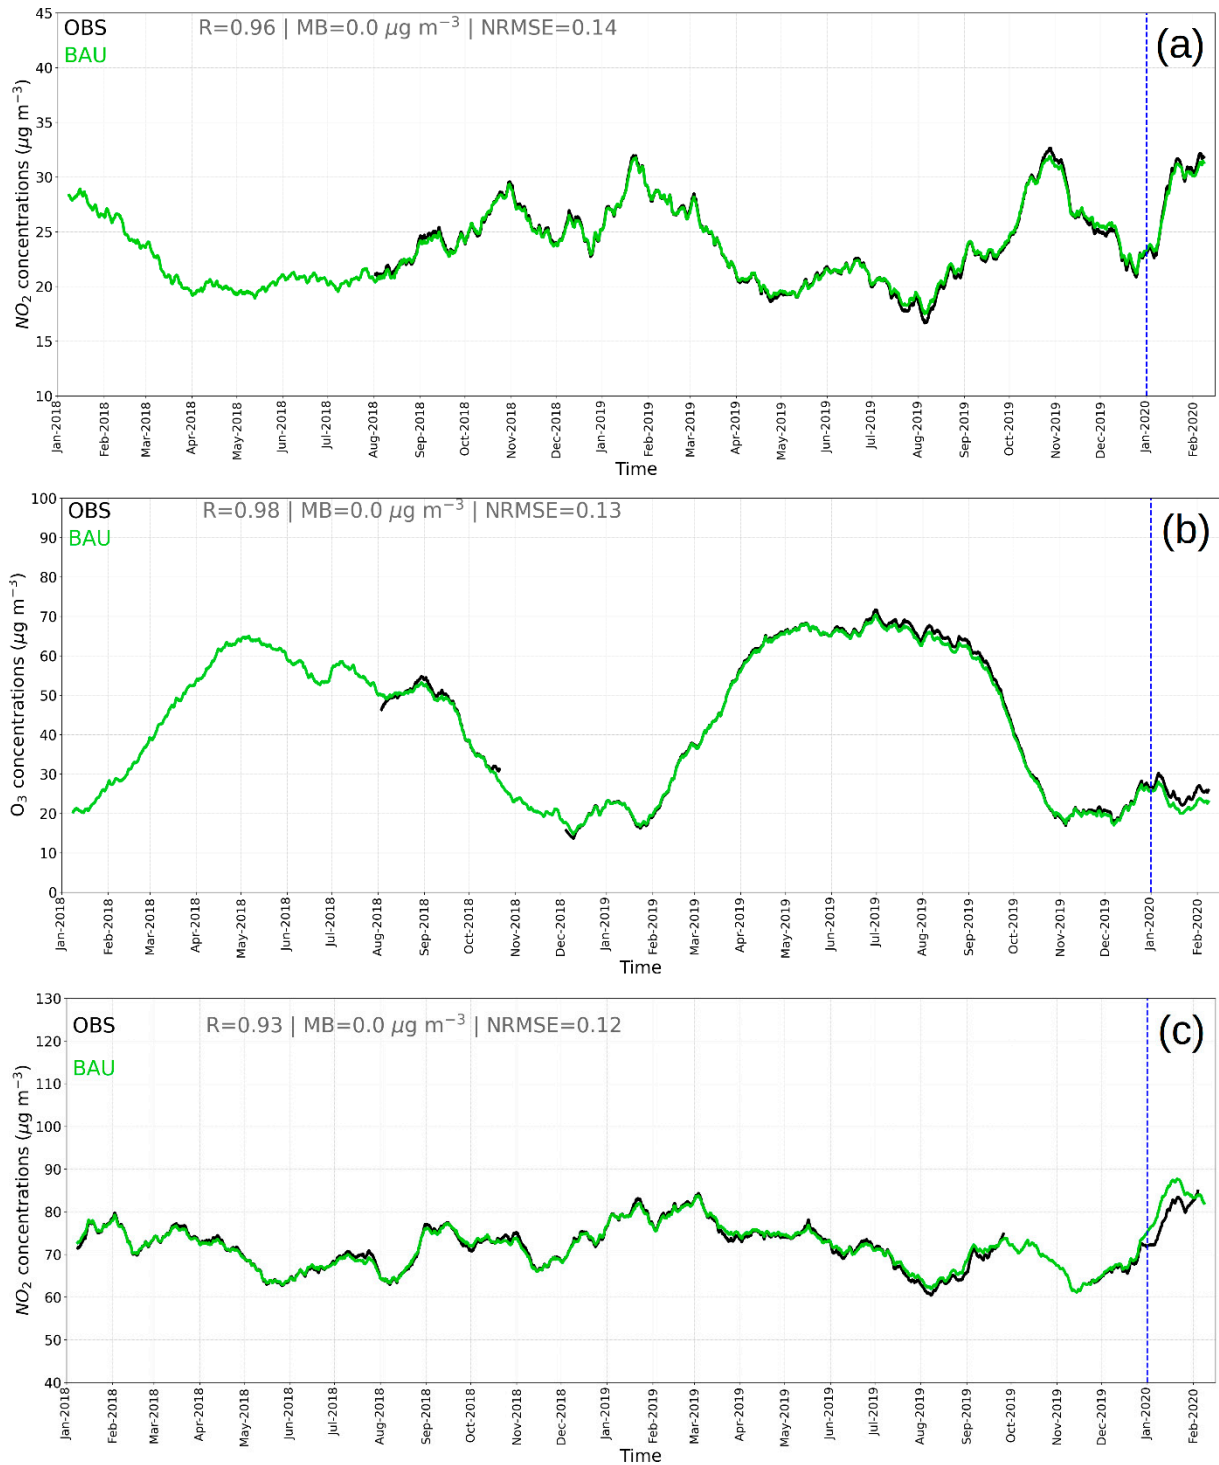

**Figure S2.** Observed (black) and BAU (green) 1-month moving average concentrations during the train (left of the blue dashed line) and test (right of the blue dashed line) periods, along with the correlation coefficient ( $R$ ), mean bias ( $\text{MB}$ ), and normalized root mean square error ( $\text{NRMSE}$ ) for the train period for AGSOFIA NO<sub>2</sub> (a), AGSOFIA O<sub>3</sub> (b), and EGNATIA NO<sub>2</sub> (c).
